# Supplementary material for: Real-World Utilization of Molnupiravir during the COVID-19 Omicron Surge in Israel
Source: MDPI journal article supplement (doi:10.3390/epidemiologia4030031), 2023-08-10
Supplement: s1 [file s1]

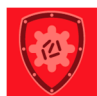

**Contents:**

A. Cohort definition

- Table S1. Risk points contributing to the cohort definition for antiviral treatment-eligible patients

B. Diagnosis codes for comorbidity definitions

C. ATC codes for medication groups

- Table S2. ATC codes for medication groups

D. Supplementary results

- Table S3. Comedications contraindicated to, or with major potential for drug-drug interactions with, nirmatrelvir/ritonavir
- Table S4. HCRU within 28 days post-index in the MOV-treated cohort (N=1,147)
- Figure S1. Outcomes following MOV treatment, by sex
- Figure S2. Outcomes following MOV treatment, by COVID-19 vaccination and/or infection status

E. Additional data on antiviral treatment eligible patients from another study

- Table S5. Select characteristics of patients treated with nirmatrelvir/ritonavir vs. patients who were offered but did not initiate treatment from a feasibility study conducted at the approximate same period at MHS [29]

## A. Cohort definition

**Table S1.** Risk points contributing to the cohort definition for antiviral treatment-eligible patients

| Risk factor                                                     | Definition                                                                                                                                                                                                                                                                                               | Risk points     |
|-----------------------------------------------------------------|----------------------------------------------------------------------------------------------------------------------------------------------------------------------------------------------------------------------------------------------------------------------------------------------------------|-----------------|
| Age                                                             | See age-specific definition of high risk*                                                                                                                                                                                                                                                                |                 |
| Obesity                                                         | Body mass index $\geq 30$ kg/m <sup>2</sup> , according to the most recent measure in the prior 5 years                                                                                                                                                                                                  | 1               |
| Diabetes                                                        | Existing MHS registry <sup>[1]</sup>                                                                                                                                                                                                                                                                     | 1               |
| Cardiovascular disease                                          | Existing MHS registry <sup>[2]</sup>                                                                                                                                                                                                                                                                     | 1               |
| Chronic kidney disease                                          | Existing MHS registry <sup>[3]</sup>                                                                                                                                                                                                                                                                     | 1               |
| Chronic liver disease                                           | ICD-9 codes 570-573                                                                                                                                                                                                                                                                                      | 1               |
| Neurologic disease                                              | ICD-9 codes 320-389 ( $\geq 2$ on separate dates)                                                                                                                                                                                                                                                        | 1               |
| Active malignancy or malignancy treated during the past 5 years | Existing registry; MHS pharmacy data                                                                                                                                                                                                                                                                     | 1               |
| Immunosuppression                                               | Existing MHS registry (including solid organ and bone marrow transplant, asplenia, recently dispensed oncologic and non-oncologic immunosuppressive treatments, advanced chronic kidney disease and other diagnosed immunosuppression)                                                                   | 1               |
| Pregnancy                                                       | Existing MHS registry                                                                                                                                                                                                                                                                                    | 1               |
| Recent hospitalization                                          | Hospitalization in the past 3 years (not including delivery/birth)                                                                                                                                                                                                                                       | 1 per admission |
| Lung disease or smoking history                                 | Existing MHS registry for COPD; ICD-9 codes for asthma (493), bronchiectasis (494), interstitial lung disease (516.3), pulmonary embolism (515.1), pulmonary hypertension (416.0), cystic fibrosis (277.0) and lung transplant (V42.6); history of tobacco use disorder and physician reports of smoking | 1               |
| COVID-19 vaccination and prior SARS-CoV-2 positive test results | unvaccinated and never infected                                                                                                                                                                                                                                                                          | 3               |
|                                                                 | 1 dose and never infected                                                                                                                                                                                                                                                                                | 2               |
|                                                                 | 2 doses and $>6$ mo since last dose                                                                                                                                                                                                                                                                      | 2               |
|                                                                 | 3 doses and $>6$ mo since last dose                                                                                                                                                                                                                                                                      | 1               |
|                                                                 | unvaccinated and infected $>3$ mo. prior                                                                                                                                                                                                                                                                 | 1               |

\*Age group was not included in the risk score, but used to define risk levels, with high risk defined as: (i) age  $\geq 70$  years; (ii) age 50-69 years with a risk score  $\geq 2$  points; (iii) age  $< 50$  years with a risk score  $\geq 4$  points. This high-risk definition was applied to patients who were deemed eligible for treatment in clinical practice by physicians in the MHS COVID-19 treatment center through February 2022.

*B. Diagnosis codes for comorbidity definitions*

The following ICD-9 codes were used to identify comorbidities diagnosed in the prior 12 months: Liver disease (570-573); Neurologic disease (320-389;  $\geq 2$  on separate dates); Asthma (439); Bronchiectasis (494); Cystic fibrosis (277.0); Interstitial lung disease (516.3); Pulmonary embolism (515.1); (Pulmonary hypertension (416.0); Lung transplant (V42.6); Tuberculosis (010-018); Disaccharide/monosaccharide deficiencies and malabsorption (271.3); Sickle cell disease (282.6); Thalassemia (282.4).

## C. ATC codes for medication groups

**Table S2.** ATC codes for medications contraindicated to, or with potential for major drug-drug interactions with, nirmatrelvir/ritonavir [4–6]

| Medication group      | ATC codes          |         |         |         |         |
|-----------------------|--------------------|---------|---------|---------|---------|
| Analgesic/antipyretic | N01AH01            | N02AA05 | N02AA08 | N02AB02 | N02AC04 |
|                       | N02AX02            | N02BB02 | N02CA01 | N02CA02 | N02CC05 |
|                       | N02CC06            | N02CD04 | N02CD06 | N02CD07 | R05DA03 |
| Anesthetic            | N01AH02<br>N01BC01 | N01AH03 | N01AX03 | N01BB01 | N01BB07 |
| Antibiotics           | D06AX01            | D10AF02 | J01FA09 | J01FA15 | J01XX12 |
|                       | J04AB02            | J04AB04 | J04AB05 | J04AK05 | J04AK06 |
|                       | P01AB07            |         |         |         |         |
| Anticonvulsant        | N03AA02            | N03AA03 | N03AB02 | N03AD01 | N03AE01 |
|                       | N03AF01            | N03AF02 | N03AG01 | N03AG06 | N03AX03 |
|                       | N03AX22            |         |         |         |         |
| Antidepressant        | N06AF04<br>N06AX28 | N06AX05 | N06AX06 | N06AX18 | N06AX24 |
| Antidiabetic          | A10BB01            | A10BH03 | A10BK02 | A10BX02 | A10BX03 |
| Antiemetic            | A04AA02            | A04AD12 |         |         |         |
| Antifungal            | J02AC02            | J02AC03 | J02AC04 | J02AC05 | J02AX07 |
| Antihistamine         | R06AX11            | R06AX12 | R06AX28 |         |         |
| Antimalarial          | P01BF01            | P01BX02 | P01BF05 | P1BF07  |         |
| Antineoplastic        | L01AC01            | L01CA02 | L01CA05 | L01CD02 | L01CD04 |
|                       | L01CX01            | L01DB01 | L01DC04 | L01EB10 | L01EE04 |
|                       | L01EL03            | L01EM04 | L01EN01 | L01EN02 | L01EN03 |
|                       | L01EX15            | L01EX18 | L01EX21 | L01EX22 | L01EX23 |
|                       | L01FD03            | L01FX17 | L01XE03 | L01XE04 | L01XE06 |
|                       | L01XE07            | L01XE08 | L01XE09 | L01XE10 | L01XE11 |
|                       | L01XE14            | L01XE15 | L01XE16 | L01XE17 | L01XE18 |
|                       | L01XE21            | L01XE23 | L01XE24 | L01XE26 | L01XE27 |
|                       | L01XE28            | L01XE33 | L01XE38 | L01XE39 | L01XE42 |
|                       | L01XE43            | L01XE44 | L01XE45 | L01XE46 | L01XE50 |
|                       | L01XE51            | L01XE53 | L01XE54 | L01XE56 | L01XE57 |
|                       | L01XX19            | L01XX42 | L01XX46 | L01XX47 | L01XX48 |
|                       | L01XX52            | L01XX61 | L01XX62 | L01XX63 | L01XX69 |
|                       | L01XX72            | L02BA02 | L02BB04 | L02BB05 | L02BX04 |
|                       |                    |         |         |         |         |
|                       |                    |         |         |         |         |
| Antiparasitics        | P01BA01<br>P01CA03 | P01BA06 | P01BC01 | P01BC02 | P01BX01 |
| Antiparkinson         | N04CX01            | N05AX17 |         |         |         |
| Antipsychotic         | N05AB10            | N05AC02 | N05AD01 | N05AD10 | N05AE04 |
|                       | N05AE05            | N05AF05 | N05AG02 | N05AH02 | N05AH04 |
|                       | N05AX08            | N05AX11 | N05AX12 | N05AX14 | N05AX15 |
|                       | N05AX16            |         |         |         |         |
| Antithrombotic agents | B01AA03            | B01AA04 | B01AC04 | B01AC23 | B01AC24 |
|                       | B01AC26            | B01AF01 | B01AF02 | B01AF03 |         |
| Antivirals            | J05AE04            | J05AE08 | J05AG02 | J05AG04 | J05AP05 |
|                       | J05AP06            | J05AP07 | J05AP11 | J05AP53 | J05AP54 |
|                       | J05AP56            | J05AP57 | J05AR09 | J05AR10 | J05AR14 |
|                       | J05AR15            | J05AR18 | J05AR22 | J05AR23 | J05AR26 |

|                                   | J05AX09 | J05AX18 | V03AX03 |         |         |
|-----------------------------------|---------|---------|---------|---------|---------|
| Cardiovascular                    | C01AA05 | C01BA01 | C01BA03 | C01BB01 | C01BB02 |
|                                   | C01BC03 | C01BD01 | C01BD04 | C01BD07 | C01EB17 |
|                                   | C01EB18 | C02AC02 | C02CA04 | C02KX01 | C02KX04 |
|                                   | C02KX05 | C03BA11 | C03DA04 | C03DA05 | C03XA01 |
|                                   | C03XA02 | C04AE04 | C05AE03 | C08CA01 | C08CA02 |
|                                   | C08CA04 | C08CA05 | C08CA06 | C08CA07 | C08CA08 |
|                                   | C08CA09 | C08CA11 | C08CA12 | C08CA13 | C08DA01 |
|                                   | C08EA02 | C09XA02 | C10AA01 | C10AA02 | C10AA05 |
|                                   | C10AA07 | C10AX12 |         |         |         |
| Corticosteroid                    | A01AC01 | H02AB13 | H02CA02 |         |         |
| Dermatological                    | D01AC08 | D07AC17 | D11AH01 | D11AH04 | D11AX22 |
| Gastro-intestinal                 | A03AE01 | A03FA02 | A03FA03 | A06AH03 | A07DA03 |
|                                   | A07EA06 |         |         |         |         |
| Genital/urinary                   | G02AB01 | G02AB03 | G02CB01 | G02CX02 | G03AA06 |
|                                   | G03AA09 | G03AA10 | G03AA11 | G03AB05 | G03AB06 |
|                                   | G03AB09 | G03AC01 | G03AC03 | G03AC08 | G03AC09 |
|                                   | G03AC10 | G03FA13 | G03XB01 | G04BD07 | G04BD08 |
|                                   | G04BD10 | G04BD11 | G04BD12 | G04BE03 | G04BE08 |
|                                   | G04BE09 | G04BE10 | G04BE11 | G04BX14 | G04CA01 |
|                                   | G04CA02 | G04CA03 | G04CA04 |         |         |
| Hematologic                       | B06AC06 | B06AX04 |         |         |         |
| Hormone                           | H01CC03 | H01CC54 |         |         |         |
| Hypnotic/sedative/anxiolytics     | N05BA01 | N05BA02 | N05BA05 | N05BA09 | N05BA12 |
|                                   | N05BB01 | N05BE01 | N05CD01 | N05CD03 | N05CD04 |
|                                   | N05CD05 | N05CD08 | N05CF01 | N05CF02 | N05CF04 |
|                                   | N05CM19 | N05CM21 |         |         |         |
| Immuno-suppressant                | L04AA10 | L04AA27 | L04AA29 | L04AA44 | L04AD01 |
|                                   | L04AD03 |         |         |         |         |
| Metabolic                         | A16AX10 | A16AX20 |         |         |         |
| Nervous system (others)           | N07BB01 | N07BC06 | N07XX13 |         |         |
| Other respiratory system products | R07AX02 | R07AX31 | R07AX31 | R07AX32 | R07AX3  |

## D. Supplementary results

**Table S3.** Comedications with a high potential for drug-drug interactions with nirmatrelvir/ritonavir

| Comedications (dispensed between 90 days pre- and 30 days post-index) | Antiviral treatment-eligible cohort, N = 5,596 <sup>1</sup> | MOV-treated cohort, N = 1,147 <sup>2</sup> |
|-----------------------------------------------------------------------|-------------------------------------------------------------|--------------------------------------------|
| Analgesic, Antipyretic                                                | 870 (15.5%)                                                 | 245 (21.4%)                                |
| Anesthetic                                                            | 0 (0.0%)                                                    | 0 (0.0%)                                   |
| Antibiotic                                                            | 98 (1.8%)                                                   | 26 (2.3%)                                  |
| Anticonvulsant                                                        | 171 (3.1%)                                                  | 63 (5.5%)                                  |
| Antidepressant                                                        | 47 (0.8%)                                                   | 14 (1.2%)                                  |
| Antidiabetic                                                          | 112 (2.0%)                                                  | 36 (3.1%)                                  |
| Antiemetic                                                            | 8 (0.1%)                                                    | 4 (0.3%)                                   |
| Antifungal                                                            | 10 (0.2%)                                                   | 3 (0.3%)                                   |
| Antihistamine                                                         | 1 (0.0%)                                                    | 0 (0.0%)                                   |
| Antineoplastic                                                        | 18 (0.3%)                                                   | 8 (0.7%)                                   |
| Antiparasitic                                                         | 1 (0.0%)                                                    | 0 (0.0%)                                   |
| Antipsychotic                                                         | 122 (2.2%)                                                  | 57 (5.0%)                                  |
| Antithrombotic                                                        | 1,044 (18.7%)                                               | 468 (40.8%)                                |
| Antivirals                                                            | 1 (0.0%)                                                    | 1 (0.1%)                                   |
| Cardiovascular                                                        | 2,995 (53.5%)                                               | 774 (67.5%)                                |
| Corticosteroid                                                        | 2 (0.0%)                                                    | 1 (0.1%)                                   |
| Dermatological                                                        | 51 (0.9%)                                                   | 10 (0.9%)                                  |
| Gastrointestinal                                                      | 80 (1.4%)                                                   | 28 (2.4%)                                  |
| Genital, Urinary                                                      | 931 (16.6%)                                                 | 221 (19.3%)                                |
| Hypnotic, Sedative, Anxiolytics                                       | 533 (9.5%)                                                  | 177 (15.4%)                                |
| Immunosuppressants                                                    | 30 (0.5%)                                                   | 7 (0.6%)                                   |
| Metabolic                                                             | 0 (0.0%)                                                    | 0 (0.0%)                                   |
| N groups listed above                                                 |                                                             |                                            |
| ≥1                                                                    | 4,041 (72.2%)                                               | 1,006 (87.3%)                              |
| 0                                                                     | 1,555 (27.8%)                                               | 141 (12.3%)                                |
| 1                                                                     | 1,936 (34.6%)                                               | 324 (28.2%)                                |
| 2                                                                     | 1,374 (24.6%)                                               | 361 (31.5%)                                |
| 3                                                                     | 535 (9.6%)                                                  | 215 (18.7%)                                |
| 4                                                                     | 153 (2.7%)                                                  | 82 (7.1%)                                  |
| 5+                                                                    | 43 (0.8%)                                                   | 24 (2.1%)                                  |

<sup>1</sup> Characteristics were summarized at SARS-CoV-2 positive test date; frequencies reported as n (%). This number includes MHS members who were offered nirmatrelvir/ritonavir or MOV and were recorded to either accept or decline treatment (irrespective of treatment dispensation)

<sup>2</sup> Subset of the antiviral treatment-eligible cohort. Characteristics were summarized at MOV dispensation date; frequencies reported as n (%).

**Table S4.** HCRU within 28 days post-index in the MOV-treated cohort (N=1,147)

| HCRU                                           | Outcome                                       | MOV-treated cohort,<br>N = 1,147 <sup>1</sup> |
|------------------------------------------------|-----------------------------------------------|-----------------------------------------------|
| PCP visits                                     | Patients with $\geq 1$ visit <sup>1</sup>     | 1,131 (98.6%)                                 |
|                                                | Patients with $\geq 2$ visits <sup>1</sup>    | 902 (78.6%)                                   |
|                                                | Number of visits <sup>2</sup>                 |                                               |
|                                                | Median (IQR)                                  | 2.0 (2.0, 4.0)                                |
|                                                | Range                                         | 1.0, 15.0                                     |
| Specialist visits                              | Patients with $\geq 1$ visit <sup>1</sup>     | 409 (35.7%)                                   |
|                                                | Patients with $\geq 2$ visits <sup>1</sup>    | 160 (13.9%)                                   |
|                                                | Number of visits <sup>2</sup>                 |                                               |
|                                                | Median (IQR)                                  | 1.0 (1.0, 2.0)                                |
|                                                | Range                                         | 1.0, 12.0                                     |
| Telemedicine visits                            | Patients with $\geq 1$ visit <sup>1</sup>     | 574 (50.0%)                                   |
|                                                | Patients with $\geq 2$ visits <sup>1</sup>    | 253 (22.1%)                                   |
|                                                | Number of visits <sup>2</sup>                 |                                               |
|                                                | Median (IQR)                                  | 1.0 (1.0, 2.0)                                |
|                                                | Range                                         | 1.0, 7.0                                      |
| ER or after-hour urgent care                   | Patients with $\geq 1$ visit <sup>1</sup>     | 108 (9.4%)                                    |
|                                                | Patients with $\geq 2$ visits <sup>1</sup>    | 29 (2.5%)                                     |
|                                                | Number of visits <sup>2</sup>                 |                                               |
|                                                | Median (IQR)                                  | 1.0 (1.0, 2.0)                                |
|                                                | Range                                         | 1.0, 3.0                                      |
| Hospitalization (all-cause)                    | Patients with $\geq 1$ admission <sup>1</sup> | 83 (7.2%)                                     |
|                                                | Patients with $\geq 2$ admission <sup>1</sup> | 10 (0.9%)                                     |
|                                                | Length of stay                                |                                               |
|                                                | Median (IQR)                                  | 4.0 (2.0, 7.0)                                |
|                                                | Range                                         | 1.0, 24.0                                     |
| Hospitalization (all-cause) with ICU admission | Patients with $\geq 1$ admission <sup>1</sup> | 12 (1.0%)                                     |
|                                                | Length of stay                                |                                               |
|                                                | Median (IQR)                                  | 3.5 (2.0, 5.0)                                |
|                                                | Range                                         | 1.0, 14.0                                     |
| Hospitalization (COVID-19 related)             | Patients with $\geq 1$ admission <sup>1</sup> | 38 (3.3%)                                     |
|                                                | Patients with $\geq 2$ admission <sup>1</sup> | 4 (0.3%)                                      |
|                                                | Length of stay                                | 4.5 (3.0, 7.0)                                |
|                                                | Median (IQR)                                  | 1.0, 24.0                                     |

<sup>1</sup> n (%) <sup>2</sup> Among patients with  $\geq 1$  visit.

**Figure S1.** Outcomes following MOV treatment, by sex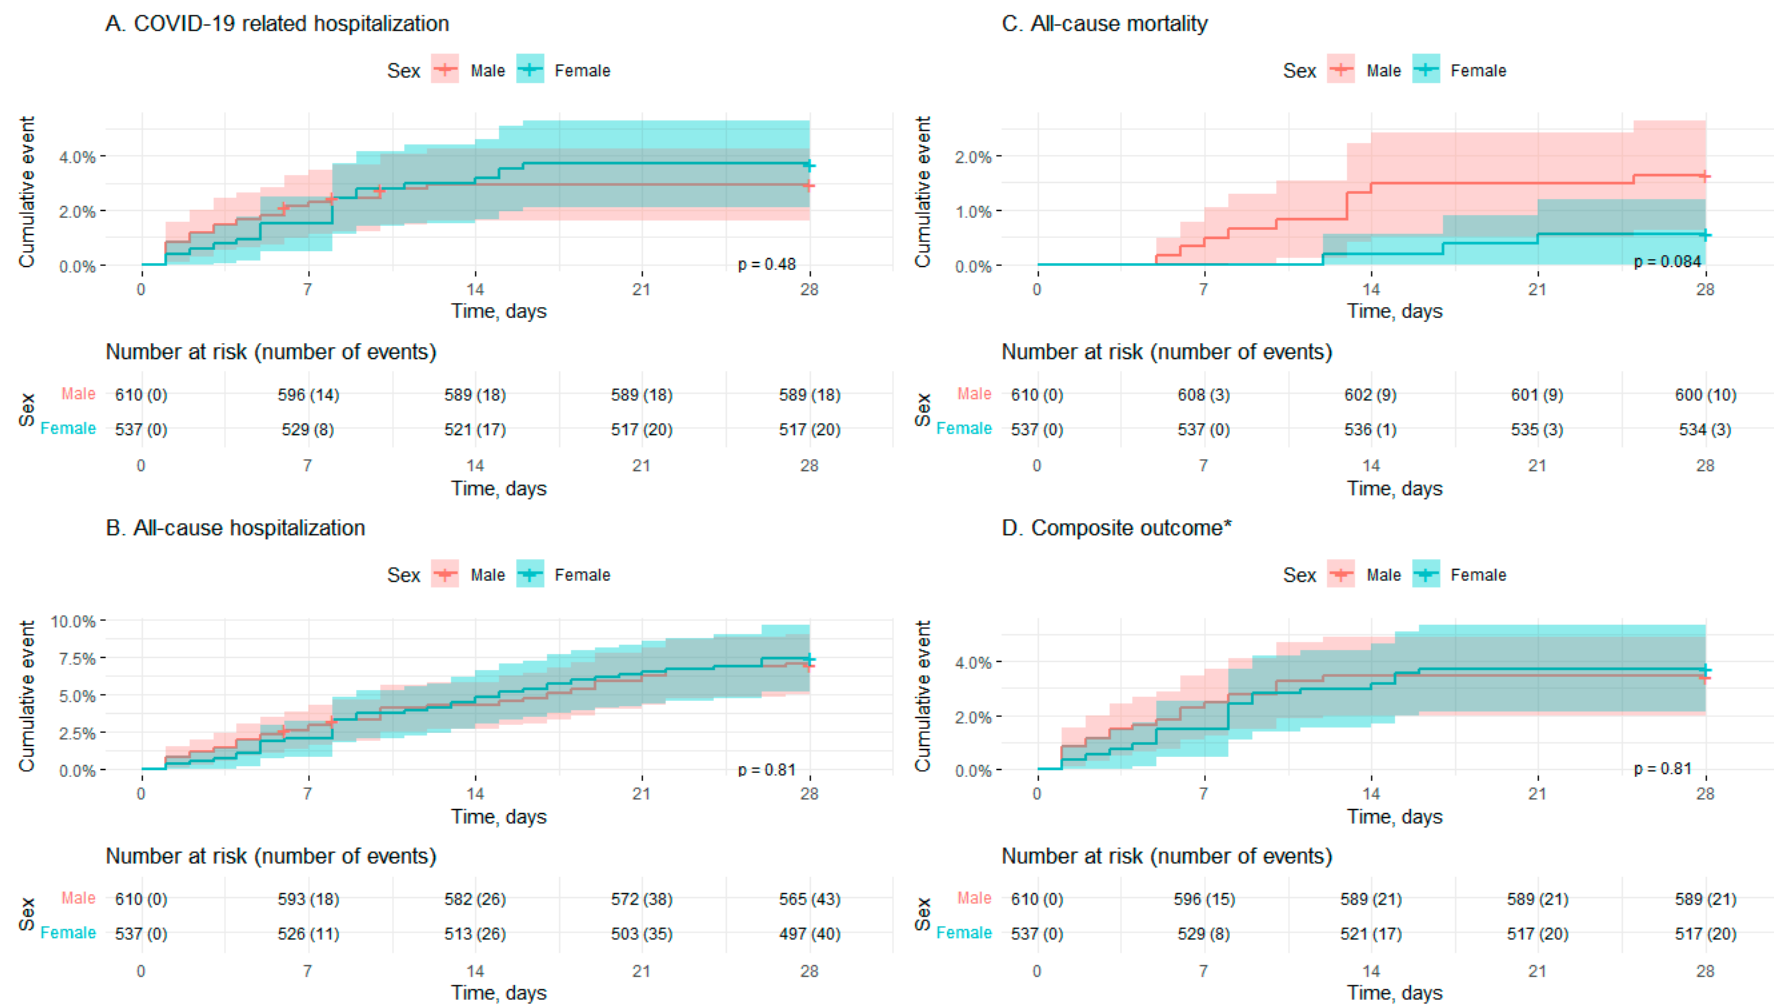

\* Composite outcome of COVID-19 related hospitalization and/or all-cause mortality



**Figure S2.** Outcomes following MOV treatment, by COVID-19 vaccination and/or infection status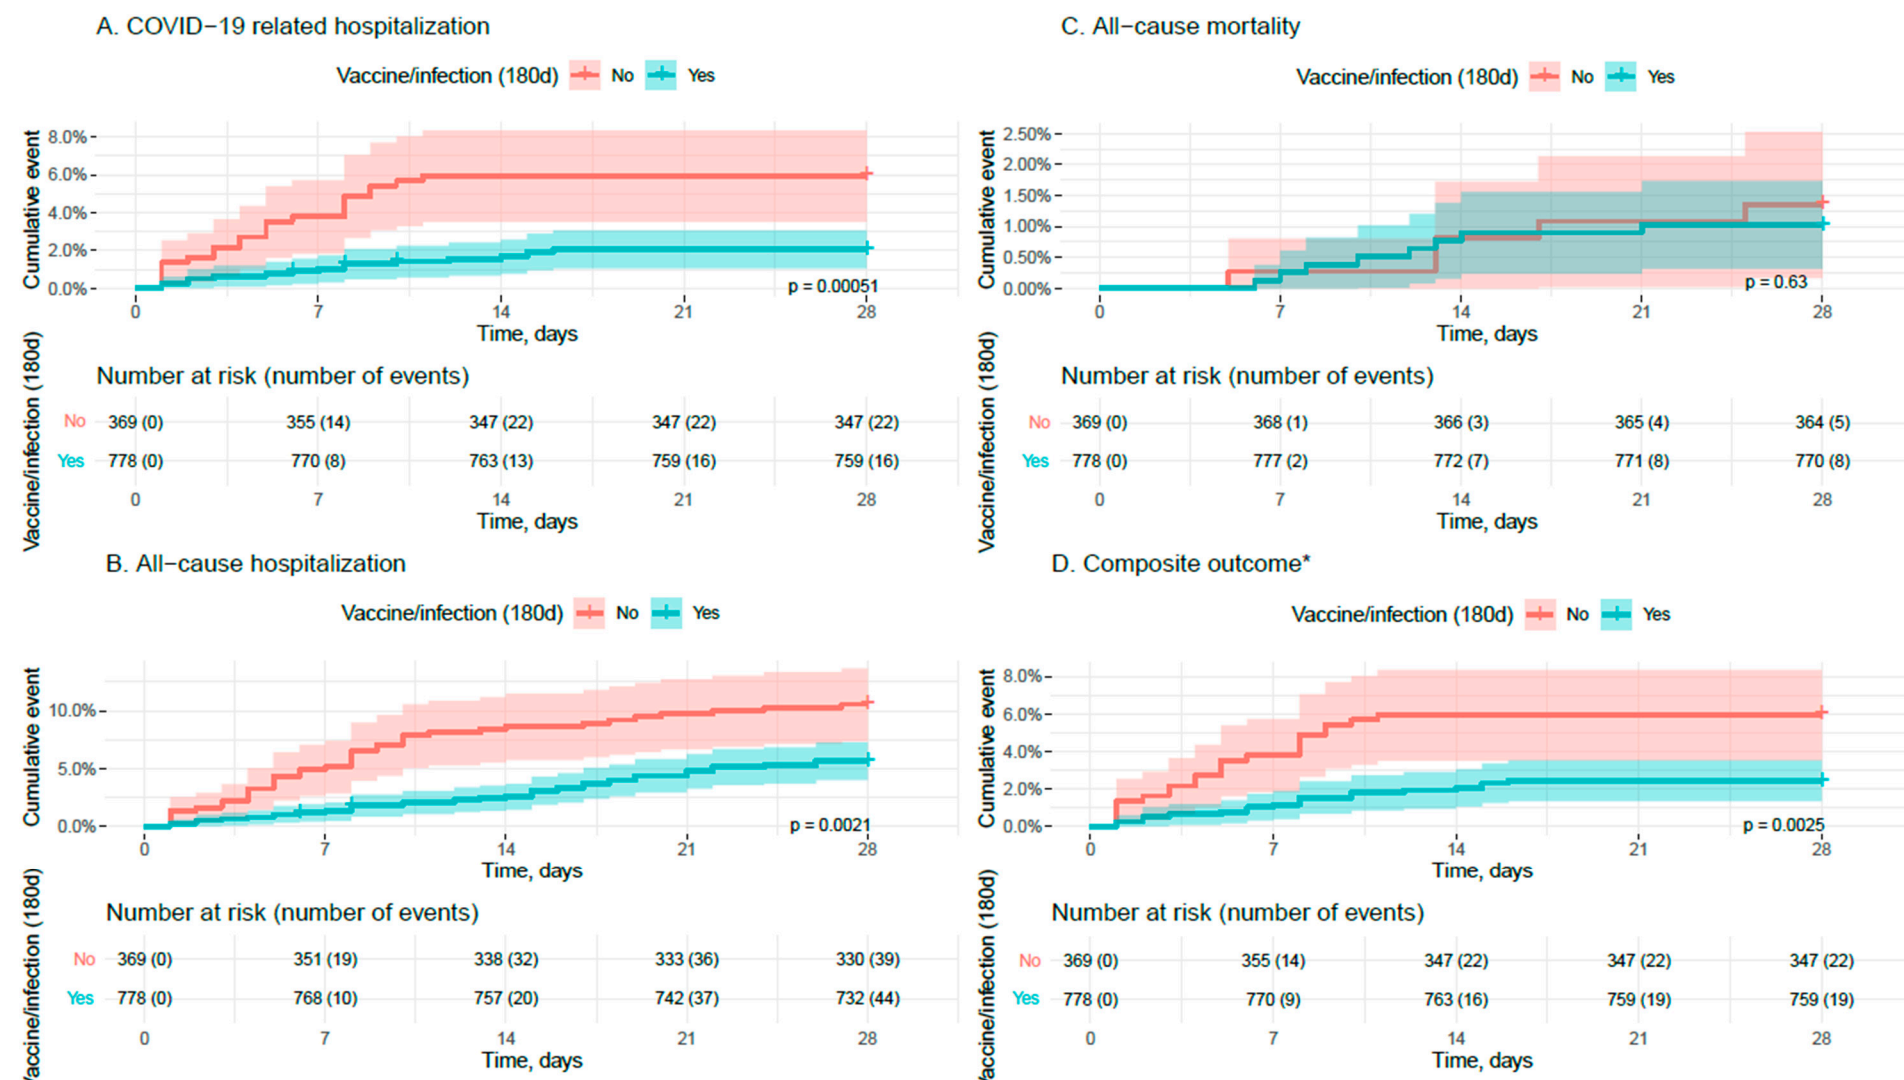

Vaccine/infection (180d) = Vaccinated ( $\geq 1$  dose) and/or previously infected, with the most recent vaccine/infection  $\leq 180$  days prior.

\* Composite outcome of COVID-19 related hospitalization and/or all-cause mortality

E. Additional data on antiviral treatment eligible patients from another study

Table S5. Select characteristics of patients treated with nirmatrelvir/ritonavir vs. patients who were offered but did not initiate treatment from a feasibility study conducted at the approximate same period at MHS [29]

| Characteristics                                    | Paxlovid<br>Treated cohort<br>(Jan 1 - Feb 28,<br>2022)<br>N = 3,714 |             | Paxlovid<br>Untreated<br>cohort<br>(Jan 1 - Feb 28,<br>2022)<br>N = 1,810 |             | SD*<br>Between<br>Treated vs.<br>Untreated |
|----------------------------------------------------|----------------------------------------------------------------------|-------------|---------------------------------------------------------------------------|-------------|--------------------------------------------|
|                                                    | N/Stat<br>1                                                          | %/Stat<br>2 | N/Stat<br>1                                                               | %/Stat<br>2 | SD                                         |
| <b>Age numeric</b>                                 |                                                                      |             |                                                                           |             | -0.02                                      |
| Mean/Std                                           | 66.8                                                                 | 11.9        | 67.1                                                                      | 13.7        |                                            |
| N/Missing Values                                   | 3,714                                                                | 0           | 1,810                                                                     | 0           |                                            |
| Lowest/Highest                                     | 19                                                                   | 103         | 18                                                                        | 100         |                                            |
| First/Third Quartile                               | 59                                                                   | 75          | 59                                                                        | 76          |                                            |
| Median/IQR                                         | 67                                                                   | 59-75       | 69                                                                        | 59-76       |                                            |
| <b>Age group, N (%)</b>                            |                                                                      |             |                                                                           |             | 0.21                                       |
| ≤49 years                                          | 219                                                                  | 5.9         | 182                                                                       | 10.1        |                                            |
| 50-69 years                                        | 1,888                                                                | 50.8        | 762                                                                       | 42.1        |                                            |
| ≥70 years                                          | 1,607                                                                | 43.3        | 866                                                                       | 47.8        |                                            |
| <b>Gender, N (%)</b>                               |                                                                      |             |                                                                           |             | -0.01                                      |
| Female                                             | 1,845                                                                | 49.7        | 902                                                                       | 49.8        |                                            |
| Male                                               | 1,869                                                                | 50.3        | 908                                                                       | 50.2        |                                            |
| <b>Chronic diseases and risk conditions, N (%)</b> |                                                                      |             |                                                                           |             |                                            |
| BMI ≥ 30 kg/m <sup>2</sup><br>(obesity)            | 1342                                                                 | 36.1        | 656                                                                       | 36.2        | 0.00                                       |
| Diabetes mellitus                                  | 1224                                                                 | 33          | 641                                                                       | 35.4        | -0.05                                      |
| Cardiovascular<br>disease (CVD)                    | 826                                                                  | 22.2        | 409                                                                       | 22.6        | -0.01                                      |
| Hypertension                                       | 2158                                                                 | 58.1        | 1147                                                                      | 63.4        | -0.11                                      |
| Chronic kidney<br>disease (CKD)                    | 651                                                                  | 17.5        | 431                                                                       | 23.8        | -0.16                                      |
| Liver disease                                      | 908                                                                  | 24.4        | 422                                                                       | 23.3        | 0.03                                       |
| Diseases of the<br>nervous system<br>(ICD-9)       | 290                                                                  | 7.8         | 137                                                                       | 7.6         | 0.00                                       |
| COPD                                               | 297                                                                  | 8           | 139                                                                       | 7.7         | 0.01                                       |
| Cancer (active or<br>treated prior 5-<br>years)    | 857                                                                  | 23.1        | 361                                                                       | 19.9        | 0.08                                       |
| Immunosuppressed                                   | 451                                                                  | 12.1        | 227                                                                       | 12.5        | -0.01                                      |
| Hospitalization in<br>prior 3-years                | 1718                                                                 | 46.3        | 851                                                                       | 47          | -0.02                                      |

| Covid-19 vaccination and previous infection, N (%) |      |      |      |      | 0.43 |
|----------------------------------------------------|------|------|------|------|------|
| Unvaccinated with no previous infection            | 357  | 9.6  | 461  | 25.5 |      |
| Unvaccinated with previous infection               | 6    | 0.2  | 7    | 0.4  |      |
| Vaccinated with no previous infection              | 3332 | 89.7 | 1327 | 73.3 |      |
| Vaccinated with previous infection                 | 19   | 0.5  | 15   | 0.8  |      |

\*STD greater than .10 in absolute value suggests potentially meaningful differences.

Tene, L.; Chodick, G.; Fallach, N.; Ansari, W.; Distelman-Menachem, T.; Maor, Y. Describing COVID-19 Patients During The First Two Months of Paxlovid (Nirmatrelvir/Ritonavir) Initiation in a Large HMO in Israel. medRxiv 2022, 2022.2005. 2002.22274586.
